# Supplementary material for: The Novelty of mRNA Viral Vaccines and Potential Harms: A Scoping Review
Source: MDPI journal article supplement (doi:10.3390/j6020017), 2023-04-17
Supplement: s1 [file s1]

**Supplementary Table S1:** Safety profile of previous LNP-mRNA products

| Intervention type                              | Treatment Target  | Payload (Protein/RNA expressed) | Manufacturer   | Product                | Trials                                                                                                                                                                                                                                                     | (AE rate) [SAE rate]           | Severe Adverse reactions                                                                 | Reference |
|------------------------------------------------|-------------------|---------------------------------|----------------|------------------------|------------------------------------------------------------------------------------------------------------------------------------------------------------------------------------------------------------------------------------------------------------|--------------------------------|------------------------------------------------------------------------------------------|-----------|
| LNP delivery of non-expressed RNA              | Polyneuropathies  | siRNA to silence transthyretin  | Sanofi Genzyme | Onpattro/patisiran     | Phase I:<br>NCT01559077 (2012)<br><a href="#">NCT02053454</a> (2014)<br>Phase 2:<br>NCT01617967(2012)<br>NCT01961921 (2013)<br>Phase 3:<br>NCT01960348 (2013-2017)<br>NCT02510261 (2015)<br>NCT03759379 (2019)<br>NCT03862807 (2019)<br>NCT03997383 (2019) | (3/29, 10%)<br>[2/29, 6%]      | urinary tract infection, sepsis, nausea, vomiting, extravasation-related cellulitis      | [1]       |
|                                                |                   |                                 |                | Givosiran              |                                                                                                                                                                                                                                                            | [6/40, 15%]                    |                                                                                          | [2]       |
| LNP delivery of RNA expressing foreign antigen | Rabies            | rabies virus glycoprotein       | CureVac AG     | CV7201                 | NCT02241135 (2013-2018)                                                                                                                                                                                                                                    | (79/101, 78%)<br>[10/101, 10%] | Bell's Palsy (1/101, 1%)                                                                 | [3]       |
|                                                | Rabies            | rabies virus glycoprotein       | CureVac AG     | CV7202                 | Phase 1:<br>NCT03713086 (2018-2021)                                                                                                                                                                                                                        | (9/10, 90%)<br>[5/10, 50%]     | Lack of appetite (3/10)<br>Night sweats (2/10)<br>Dizziness (1/10)<br>Tachycardia (1/10) | [4]       |
|                                                | Chikungunya virus | Chikungunya virus antigens      | Moderna        | VAL-181388 / mRNA-1388 | Phase 1:<br>NCT03325075 (2017-2020)                                                                                                                                                                                                                        |                                | No data available                                                                        |           |
|                                                | Cytomegalovirus   | Pentameric complex and          | Moderna        | mRNA-1647              | Phase 1:                                                                                                                                                                                                                                                   |                                | No data available                                                                        |           |

|  |                                                           |                                         |                    |           |                                                                 |                                                                                                       |                       |       |
|--|-----------------------------------------------------------|-----------------------------------------|--------------------|-----------|-----------------------------------------------------------------|-------------------------------------------------------------------------------------------------------|-----------------------|-------|
|  |                                                           | B glycoprotein                          |                    |           | NCT03382405 (2017-2021)<br>Phase 2:<br>NCT04232280 (2020-2022*) |                                                                                                       |                       |       |
|  | Metapneumovirus and parainfluenza virus type 3 (MPV/PIV3) | MPV and PIV3 F glycoproteins            | Moderna            | mRNA-1653 | Phase I: NCT03392389 (2017-2019)                                |                                                                                                       | No data available     |       |
|  | Respiratory Syncytial Virus (RSV)                         | F glycoprotein                          | Moderna            | mRNA-1345 | Phase 1:<br>NCT04528719(2020-2023*)                             |                                                                                                       | Recruiting            |       |
|  | Zika Virus (ZIKV)                                         | Pre-membrane and envelope glycoproteins | Moderna            | mRNA-1893 | Phase I: NCT04064905 (2019-2021)                                |                                                                                                       | No data available     |       |
|  | Influenza H7N9                                            | Haemagglutinin                          | Moderna            | mRNA-1851 | Phase 1:<br>NCT03345043 (2016-2018)                             | (53.3-73.3%)<br>30/90, 20-30%]                                                                        |                       | [5,6] |
|  | Influenza H10N8                                           | Haemagglutinin                          | Moderna            | mRNA-1440 | Phase 1:<br>NCT03345043 (2016-2018)                             | (>80%)<br>[5/84, 6%]                                                                                  |                       | [5,6] |
|  | HIV-1                                                     |                                         | Argos Therapeutics | AGS 004   | Phase II:<br>NCT00672191 (2008-2011)                            | (25/35, 72%)<br>lower than placebo arm<br>[0/35, 0%]<br><br>No difference in viral load between arms. | Local site reactions, | [7]   |

|                |                                                                          |                                     |                           |            |                                     |                                                       |                                                       |      |
|----------------|--------------------------------------------------------------------------|-------------------------------------|---------------------------|------------|-------------------------------------|-------------------------------------------------------|-------------------------------------------------------|------|
|                |                                                                          |                                     |                           |            | Phase I: NCT02042248 (2014-2016)    | Data not available                                    |                                                       |      |
|                |                                                                          |                                     |                           |            | Phase II: NCT01069809 (2010-2015)   | Data not available                                    |                                                       |      |
|                |                                                                          |                                     |                           |            | Phase II: NCT02888756 (2017-2018)   | (16/26, 100%)<br>[2/16, 12.5%]<br>same as placebo arm | Gastrointestinal disorders                            | [8]  |
|                |                                                                          |                                     |                           |            | Phase I: NCT02413645 (2015-2016)    | [1/21, 5%]                                            |                                                       | [9]  |
|                |                                                                          |                                     |                           |            | Phase I/II: NCT00833781 (2009-2013) | [0/10, 0%]                                            |                                                       | [10] |
|                |                                                                          |                                     |                           |            | Phase I/II: NCT00381212             | (7/10, 70%)<br>[2/10, 20%]                            |                                                       |      |
| Cancer vaccine | Non-small-cell lung cancer, colorectal cancer, pancreatic adenocarcinoma | KRAS antigens                       | National Cancer Institute | (NCI)-4650 | Phase II: NCT03480152 (2018-2020)   | (4/4, 100%)<br>[0/4, 0%]                              |                                                       |      |
|                | Melanoma                                                                 | Personalized neoantigens            | Moderna                   | mRNA-4157  | Phase II: NCT03897881 (2019-2024*)  |                                                       |                                                       |      |
|                | Gastrointestinal cancer                                                  | Personalized neoantigens            | Moderna                   | mRNA-4650  | Phase I/II: NCT03480152 (2018-2019) | (4/4, 100%)<br>[0/4, 0%]                              |                                                       |      |
|                | Melanoma                                                                 | NY-ESO-1, tyrosinase, MAGE-A3, TPTE | BioNTech                  | FixVac     | Phase I: NCT02410733 (2015-2023*)   | [23/92, 25%]                                          | Lymphocyte count decreased, lymphopenia, hypertension | [11] |
|                | Triple-negative                                                          | Personalized neoantigens            | BioNTech                  | TNBC-MERIT | Phase I: NCT02316457 (2016-2023*)   |                                                       |                                                       |      |

|  |                            |                                              |           |                   |                                      |                                                     |                                                                                   |      |
|--|----------------------------|----------------------------------------------|-----------|-------------------|--------------------------------------|-----------------------------------------------------|-----------------------------------------------------------------------------------|------|
|  | breast cancer              |                                              |           |                   |                                      |                                                     |                                                                                   |      |
|  | HPV-positive cancers       | HPV oncoproteins E6 and E7                   | BioNTech  | HARE-40/BNT113    | Phase I/II: NCT03418480 (2017-2024*) |                                                     |                                                                                   |      |
|  | Melanoma                   | Personalized neoantigens                     | BioNTech  | RO7198457         | Phase II: NCT03815058 (2019-2024*)   |                                                     |                                                                                   |      |
|  | Ovarian cancer             | Ovarian cancer antigens                      | BioNTech  | W_ova1            | Phase I: NCT04163094 (2019-2023*)    |                                                     |                                                                                   |      |
|  | Solid tumours              | OX40L                                        | Moderna   | mRNA 2416         | Phase II: NCT03323398 (2017-2021)    |                                                     | Terminated, efficacy endpoints not met                                            |      |
|  | Solid tumours              | OX40L, IL-23 and IL-36 $\gamma$              | Moderna   | mRNA-2752         | Phase I: NCT03739931 (2018-2023*)    |                                                     |                                                                                   |      |
|  | Solid tumours              | IL-12                                        | MedImmune | MEDI1191          | Phase I: NCT03946800 (2019-2027*)    |                                                     |                                                                                   |      |
|  | Solid tumours              | IL-12sc, IL-15sushi, IFN $\alpha$ and GM-CSF | BioNTech  | SAR441000/BN T131 | Phase I: NCT03871348 (2019-2024*)    |                                                     |                                                                                   |      |
|  | Advanced Melanoma          |                                              | BioNTech  | BNT111            | Phase II: NCT04526899(2021-2024*)    | [23 grade 3 or above events out of 89 participants] | Pyrexia, chills, lymphocyte count decreased, lymphopenia, hypertension, dizziness | [11] |
|  | Cancer                     | KRAS                                         | Moderna   | mRNA-5671/V941    | Phase I: NCT03948763 (2019-2022)     | Data not available                                  |                                                                                   |      |
|  | Non-small cell lung cancer |                                              | CureVac   | CV9202            | Phase Ib: NCT01915524                | [4/26, 15.4%]                                       | Dysphagia, fatigue, pyrexia                                                       | [12] |

|  |                               |                       |                     |                                       |                                                                              |                                             |                                             |         |
|--|-------------------------------|-----------------------|---------------------|---------------------------------------|------------------------------------------------------------------------------|---------------------------------------------|---------------------------------------------|---------|
|  |                               |                       |                     |                                       |                                                                              |                                             |                                             |         |
|  | Urea Disorder                 | Ornithine carboxylase | Arcturus            | ARCT-810                              | Phase I: NCT04416126 (2020-2020)<br>Phase I: NCT04442347 (2020-2022*)        | Data not available                          |                                             |         |
|  | Solid tumours                 |                       | CureVac             | CV8102                                | Phase I: NCT03291002 (2017-2023*)                                            | [2/14]                                      |                                             | [13]    |
|  | Rabies vaccine adjuvant       |                       | CureVac             | CV8102 (co-administered with Rabipur) | Phase I: NCT02238756 (2014-2016)                                             | [11 events out of 37 participants]          | Pain, headache, myalgia/arthralgia, fatigue | [14]    |
|  | Solid tumours                 |                       | BioNTech            | BNT122 (RO7198457)                    | Phase II: NCT04486378 (2021-2027*)                                           |                                             |                                             |         |
|  | Generalized myasthenia gravis |                       | Cartesian           | Descartes-08                          | Phase II: NCT04816526 (2021-2025*)                                           |                                             |                                             |         |
|  | Cystic Fibrosis               |                       | Translate Bio       | MRT5005                               | Phase I/II: NCT03375047 (2018-2021)                                          | [1/16, 6%]                                  | Pulmonary exacerbation                      | [15]    |
|  | Methylmalonic aciduria        |                       | Moderna             | mRNA-3704                             | Phase I/II: NCT03810690 (2019-2020)<br>Terminated due to a business decision |                                             |                                             |         |
|  | Cancer                        |                       | Moderna             | mRNA-4157                             | Phase I: NCT03313778 (2017-2025*)                                            | [no drug related SAEs in 33 patients]       |                                             | [16]    |
|  | Multiple myeloma              |                       | Poseida             | P-BCMA-101                            | Phase II: NCT03288493                                                        | Unknown, though several SAEs in 12 patients | cytopenias and febrile neutropenia          | [17,18] |
|  | Ischemic heart disease        | vascular endothelial  | Moderna/AstraZeneca | AZD8601                               | Phase II: NCT03370887 (2018-2021)                                            |                                             |                                             | [19,20] |

|  |                  |                 |  |         |                                  |  |                          |      |
|--|------------------|-----------------|--|---------|----------------------------------|--|--------------------------|------|
|  |                  | growth factor A |  |         |                                  |  |                          |      |
|  | Type II diabetes |                 |  | AZD8601 | Phase I: NCT02935712 (2017-2018) |  | Injection site reactions | [21] |

- 1 Suhr OB, Coelho T, Buades J, *et al.* Efficacy and safety of patisiran for familial amyloidotic polyneuropathy: a phase II multi-dose study. *Orphanet J Rare Dis* 2015;**10**:109. doi:10.1186/s13023-015-0326-6
- 2 Balwani M, Sardh E, Ventura P, *et al.* Phase 3 Trial of RNAi Therapeutic Givosiran for Acute Intermittent Porphyria. *N Engl J Med* 2020;**382**:2289–301. doi:10.1056/NEJMoa1913147
- 3 Alberer M, Gnad-Vogt U, Hong HS, *et al.* Safety and immunogenicity of a mRNA rabies vaccine in healthy adults: an open-label, non-randomised, prospective, first-in-human phase 1 clinical trial. *Lancet* 2017;**390**:1511–20. doi:10.1016/S0140-6736(17)31665-3
- 4 Aldrich C, Leroux-Roels I, Huang KB, *et al.* Proof-of-concept of a low-dose unmodified mRNA-based rabies vaccine formulated with lipid nanoparticles in human volunteers: A phase 1 trial. *Vaccine* 2021;**39**:1310–8. doi:10.1016/j.vaccine.2020.12.070
- 5 Feldman RA, Fuhr R, Smolenov I, *et al.* mRNA vaccines against H10N8 and H7N9 influenza viruses of pandemic potential are immunogenic and well tolerated in healthy adults in phase 1 randomized clinical trials. *Vaccine* 2019;**37**:3326–34. doi:10.1016/j.vaccine.2019.04.074
- 6 Bahl K, Senn JJ, Yuzhakov O, *et al.* Preclinical and Clinical Demonstration of Immunogenicity by mRNA Vaccines against H10N8 and H7N9 Influenza Viruses. *Molecular Therapy* 2017;**25**:1316–27. doi:10.1016/j.ymthe.2017.03.035
- 7 Jacobson JM, Routy J-P, Welles S, *et al.* Dendritic Cell Immunotherapy for HIV-1 Infection Using Autologous HIV-1 RNA: A Randomized, Double-Blind, Placebo-Controlled Clinical Trial. *JAIDS Journal of Acquired Immune Deficiency Syndromes* 2016;**72**:31–8. doi:10.1097/QAI.0000000000000926
- 8 de Jong W, Aerts J, Allard S, *et al.* iHIVARNA phase IIa, a randomized, placebo-controlled, double-blinded trial to evaluate the safety and immunogenicity of iHIVARNA-01 in chronically HIV-infected patients under stable combined antiretroviral therapy. *Trials* 2019;**20**:361. doi:10.1186/s13063-019-3409-1
- 9 Leal L, Guardo AC, Morón-López S, *et al.* Phase I clinical trial of an intranodally administered mRNA-based therapeutic vaccine against HIV-1 infection. *AIDS* 2018;**32**:2533–45. doi:10.1097/QAD.0000000000002026

- 10 Gandhi RT, Kwon DS, Macklin EA, *et al.* Immunization of HIV-1-Infected Persons With Autologous Dendritic Cells Transfected With mRNA Encoding HIV-1 Gag and Nef: Results of a Randomized, Placebo-Controlled Clinical Trial. *JAIDS Journal of Acquired Immune Deficiency Syndromes* 2016;**71**:246–53. doi:10.1097/QAI.0000000000000852
- 11 Sahin U, Oehm P, Derhovanessian E, *et al.* An RNA vaccine drives immunity in checkpoint-inhibitor-treated melanoma. *Nature* 2020;**585**:107–12. doi:10.1038/s41586-020-2537-9
- 12 Papachristofilou A, Hipp MM, Klinkhardt U, *et al.* Phase Ib evaluation of a self-adjuvanted protamine formulated mRNA-based active cancer immunotherapy, BI1361849 (CV9202), combined with local radiation treatment in patients with stage IV non-small cell lung cancer. *J Immunother Cancer* 2019;**7**:38. doi:10.1186/s40425-019-0520-5
- 13 Eigentler T, Bauernfeind FG, Becker JC, *et al.* A phase I dose-escalation and expansion study of intratumoral CV8102 as single-agent or in combination with anti-PD-1 antibodies in patients with advanced solid tumors. *JCO* 2020;**38**:3096–3096. doi:10.1200/JCO.2020.38.15\_suppl.3096
- 14 Doener F, Hong HS, Meyer I, *et al.* RNA-based adjuvant CV8102 enhances the immunogenicity of a licensed rabies vaccine in a first-in-human trial. *Vaccine* 2019;**37**:1819–26. doi:10.1016/j.vaccine.2019.02.024
- 15 Translate Bio Announces Results from Second Interim Data Analysis from Ongoing Phase 1/2 Clinical Trial of MRT5005 in Patients with Cystic Fibrosis (CF). BioSpace. <https://www.biospace.com/article/translate-bio-announces-results-from-second-interim-data-analysis-from-ongoing-phase-1-2-clinical-trial-of-mrt5005-in-patients-with-cystic-fibrosis-cf/> (accessed 13 Oct 2022).
- 16 Burris HA, Patel MR, Cho DC, *et al.* A phase I multicenter study to assess the safety, tolerability, and immunogenicity of mRNA-4157 alone in patients with resected solid tumors and in combination with pembrolizumab in patients with unresectable solid tumors. *JCO* 2019;**37**:2523–2523. doi:10.1200/JCO.2019.37.15\_suppl.2523
- 17 Costello CL, Gregory TK, Ali SA, *et al.* Phase 2 Study of the Response and Safety of P-Bcma-101 CAR-T Cells in Patients with Relapsed/Refractory (r/r) Multiple Myeloma (MM) (PRIME). *Blood* 2019;**134**:3184–3184. doi:10.1182/blood-2019-129562
- 18 Gregory T, Cohen AD, Costello CL, *et al.* Efficacy and Safety of P-Bcma-101 CAR-T Cells in Patients with Relapsed/Refractory (r/r) Multiple Myeloma (MM). *Blood* 2018;**132**:1012. doi:10.1182/blood-2018-99-111419
- 19 Anttila V, Saraste A, Knuuti J, *et al.* Synthetic mRNA Encoding VEGF-A in Patients Undergoing Coronary Artery Bypass Grafting: Design of a Phase 2a Clinical Trial. *Mol Ther Methods Clin Dev* 2020;**18**:464–72. doi:10.1016/j.omtm.2020.05.030

- 20 Late-Breaking Science Abstracts and Featured Science Abstracts From the American Heart Association's Scientific Sessions 2021 and Late-Breaking Abstracts in Resuscitation Science From the Resuscitation Science Symposium 2021. *Circulation* 2021;**144**:e564–93. doi:10.1161/CIR.0000000000001041
- 21 Gan L-M, Lagerström-Fermér M, Carlsson LG, *et al.* Intradermal delivery of modified mRNA encoding VEGF-A in patients with type 2 diabetes. *Nat Commun* 2019;**10**:1–9. doi:10.1038/s41467-019-08852-4
